# Supplementary material
Source: HighWire-hosted journal article supplement (https://bmjopen.bmj.com/content/8/2/e017442)
Supplement: inline-supplementary-material-1 [file inline-supplementary-material-1.pdf]

**Supplemental Table 1. Basic characteristics of patients taking different statin dosages**

| Variables     | Statin nonusers |      |                                    |      |                               |      |                               |      |                             |      | P value             | P value <sup>c</sup> |
|---------------|-----------------|------|------------------------------------|------|-------------------------------|------|-------------------------------|------|-----------------------------|------|---------------------|----------------------|
|               | group           |      | Group 1 ( $\leq$ Q1 <sup>a</sup> ) |      | Group 2 (Q1-Q2 <sup>a</sup> ) |      | Group 3 (Q2-Q3 <sup>a</sup> ) |      | Group 4 (>Q3 <sup>a</sup> ) |      |                     |                      |
|               |                 |      |                                    |      |                               |      |                               |      |                             |      |                     |                      |
|               |                 |      | (n=164,454)                        |      | (n=1,810)                     |      | (n=1,818)                     |      | (n=1,841)                   |      |                     |                      |
|               | n               | %    | n                                  | %    | n                             | %    | n                             | %    | n                           | %    |                     |                      |
| Age (years)   |                 |      |                                    |      |                               |      |                               |      |                             |      |                     |                      |
| mean $\pm$ SD | 49.6 $\pm$ 6.9  |      | 53.2 $\pm$ 6.9                     |      | 53.1 $\pm$ 6.8                |      | 53.6 $\pm$ 6.9                |      | 53.9 $\pm$ 6.6              |      | <0.001 <sup>b</sup> | <0.001 <sup>†</sup>  |
| 40-49         | 96900           | 58.9 | 651                                | 36.0 | 670                           | 36.9 | 608                           | 33.0 | 539                         | 30.5 | <0.001 <sup>d</sup> |                      |
| 50-59         | 49040           | 29.8 | 764                                | 42.2 | 757                           | 41.6 | 802                           | 43.6 | 829                         | 46.9 |                     |                      |
| 60-65         | 18514           | 11.3 | 395                                | 21.8 | 391                           | 21.5 | 431                           | 23.4 | 401                         | 22.7 |                     |                      |
| Sex           |                 |      |                                    |      |                               |      |                               |      |                             |      |                     |                      |
| Female        | 79239           | 48.2 | 959                                | 53.0 | 935                           | 51.4 | 944                           | 51.3 | 884                         | 50.0 | <0.001 <sup>d</sup> |                      |
| Male          | 85215           | 51.8 | 851                                | 47.0 | 883                           | 48.6 | 897                           | 48.7 | 885                         | 50.0 |                     |                      |
| CCI           |                 |      |                                    |      |                               |      |                               |      |                             |      |                     |                      |

|                       |           |      |           |      |           |      |           |      |           |      |                     |                     |
|-----------------------|-----------|------|-----------|------|-----------|------|-----------|------|-----------|------|---------------------|---------------------|
| mean ± SD             | 0.4 ± 0.8 |      | 0.8 ± 1.2 |      | 0.9 ± 1.3 |      | 1.0 ± 1.3 |      | 1.1 ± 1.4 |      | <0.001 <sup>b</sup> | <0.001 <sup>†</sup> |
| 0                     | 125655    | 76.4 | 1037      | 57.3 | 935       | 51.4 | 882       | 47.9 | 777       | 43.9 | <0.001 <sup>d</sup> |                     |
| 1                     | 25547     | 15.5 | 437       | 24.1 | 509       | 28.0 | 520       | 28.3 | 503       | 28.4 |                     |                     |
| 2                     | 8485      | 5.2  | 195       | 10.8 | 197       | 10.8 | 235       | 12.8 | 228       | 12.9 |                     |                     |
| ≥3                    | 4767      | 2.9  | 141       | 7.8  | 177       | 9.7  | 204       | 11.1 | 261       | 14.8 |                     |                     |
| <b>Monthly income</b> |           |      |           |      |           |      |           |      |           |      |                     |                     |
| <b>(USD)</b>          |           |      |           |      |           |      |           |      |           |      |                     |                     |
| ≤600                  | 79098     | 48.1 | 983       | 54.3 | 1005      | 55.3 | 1064      | 57.8 | 1074      | 60.7 | <0.001 <sup>d</sup> |                     |
| 600 - 1,400           | 62954     | 38.3 | 624       | 34.5 | 609       | 33.5 | 567       | 30.8 | 519       | 29.3 |                     |                     |
| >1,400                | 22402     | 13.6 | 203       | 11.2 | 204       | 11.2 | 210       | 11.4 | 176       | 10.0 |                     |                     |
| <b>Living area</b>    |           |      |           |      |           |      |           |      |           |      |                     |                     |
| Urban                 | 101983    | 62.0 | 1118      | 61.8 | 1157      | 63.6 | 1195      | 64.9 | 1193      | 67.4 | <0.001 <sup>d</sup> |                     |
| Suburban              | 21874     | 13.3 | 252       | 13.9 | 239       | 13.2 | 241       | 13.1 | 228       | 12.9 |                     |                     |

|       |       |      |     |      |     |      |     |      |     |      |
|-------|-------|------|-----|------|-----|------|-----|------|-----|------|
| Rural | 40597 | 24.7 | 440 | 24.3 | 422 | 23.2 | 405 | 22.0 | 348 | 19.7 |
|-------|-------|------|-----|------|-----|------|-----|------|-----|------|

---

Characteristics, including age, sex, the CCI, monthly income, and living area, of the recruited patients taking different dosages of statin are displayed.

<sup>a</sup> Q1: Statin dosage of 5,400 mg, Q2: statin dosage of 11,900 mg, Q3: statin dosage of 28,000 mg

<sup>b</sup> Kruskal-Wallis test

<sup>c</sup> One-way ANOVA

<sup>d</sup> Chi-Square test

<sup>†</sup> Tukey-Kramer test significant: non-statin group vs. group 1, non-statin group vs. group 2, non-statin group vs. group 3, non-statin group vs. group 4, group 1 vs. group 4, and group 2 vs. group 4

<sup>‡</sup> Tukey-Kramer test significant: all comparisons were significant

CCI: Charlson comorbidity index, USD: United States dollar, SD: standard deviation
